# Supplementary material
Source: MDPI journal article supplement (https://www.mdpi.com/2079-6412/13/9/1523)
Supplement: s1 [file s1]

# Supporting information

## Magneto-Plasmonic Nanoparticles Generated by Laser Ablation of Layered Fe/Au and Fe/Au/Fe Composite Films for SERS Application

Lina Mikoliunaite<sup>1,2,\*</sup>, Evaldas Stankevičius<sup>3</sup>, Sonata Adomavičiūtė-Grabusovė<sup>4</sup>, Vita Petrikaitė<sup>3</sup>, Romualdas Trusovas<sup>3</sup>, Martynas Talaikis<sup>1</sup>, Martynas Skapas<sup>5</sup>, Agnė Zdaniasauskienė<sup>1</sup>, Algirdas Selskis<sup>5</sup>, Valdas Šablinskas<sup>4</sup> and Gediminas Niaura<sup>1,\*</sup>

1 Department of Organic Chemistry, Center for Physical Sciences and Technology (FTMC), Sauletekio Av. 3, LT-10257 Vilnius, Lithuania;

2 Department of Physical Chemistry, Faculty of Chemistry and Geosciences, Vilnius University, Naugarduko Str. 24, LT-03225 Vilnius, Lithuania;

3 Department of Laser Technologies, Center for Physical Sciences and Technology (FTMC), Savanoriu Av. 231, LT-02300 Vilnius, Lithuania;

4 Institute of Chemical Physics, Faculty of Physics, Vilnius University, Sauletekio Av. 3, LT-10257 Vilnius, Lithuania;

5 Department of Characterization of Materials, Center for Physical Sciences and Technology (FTMC), Sauletekio Av. 3, LT-10257 Vilnius, Lithuania.

\*Correspondence: lina.mikoliunaite@ftmc.lt; gediminas.niaura@ftmc.lt

### Magnetic measurements

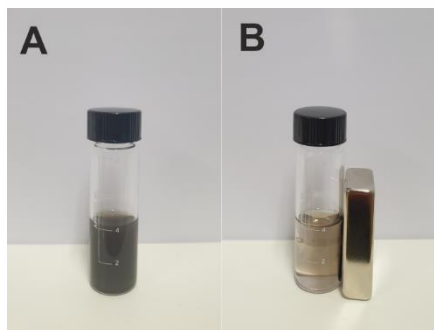

**Figure S1.** Photographs of ablated magneto-plasmonic nanoparticles in acetone (A) just prepared and (B) 15 minutes after exposure to a permanent magnet.

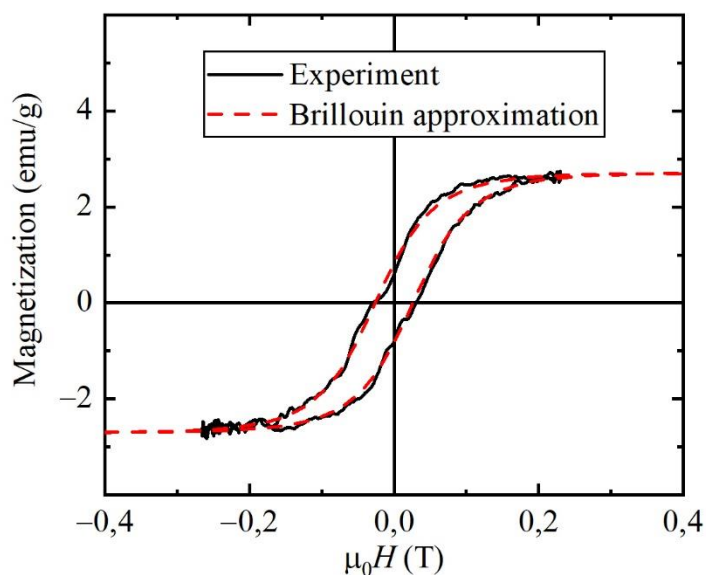

**Figure S2.** Hysteresis loop of the laser ablated magneto-plasmonic nanoparticles (Fe50/Au150/Fe25) (black), and approximation with Brillouin function (red);

### Enhancement Factor Calculations

Enhancement factor (*EF*) calculations for 632.8 nm excitation wavelength were performed for SERS substrate produced from Fe100/Au150 coating for adsorbed 4-mercaptobenzoic acid (4-MBA) molecule as following:

$EF = (I_{SERS} \times N_{Raman}) / (I_{Raman} \times N_{SERS})$ , where  $I_{SERS}$  and  $I_{Raman}$  represent the intensities of SERS and Raman spectral bands at 1588  $\text{cm}^{-1}$ ,  $N_{Raman}$  and  $N_{SERS}$  – the average number of excited molecules in Raman and SERS experiments respectively.

SERS and Raman spectra were collected using MonoVista CRS+ spectrometer (S&I, Germany) with 100×/0.8NA objective lens and a laser wavelength of  $\lambda = 632.8$  nm (0.8 mW). The diameter  $D$  of the focused laser radiation was approximately 1  $\mu\text{m}$  calculated using formula (1):

$$D = \frac{1.22 \times \lambda}{NA} \quad (1),$$

The reported surface density for 4-MBA molecules is about 0.5 nmol/cm<sup>2</sup> [S1]. Therefore, the number of adsorbed molecules on the hybrid Fe100/Au150 substrate is  $N_{SERS} = 2.2 \times 10^6$ . For the Raman experiment, the laser volume was considered as a cylinder with the diameter  $D$  and length  $L$ :

$$L = \frac{16\lambda f^2}{\pi d^2} \quad (2)$$

where,  $d$  is the diameter of the unfocused laser beam,  $f$  is the focal length of objective lens [S2]. These parameters were as follows:  $d = 2$  mm,  $f = 6$  mm.

Considering the penetration length of the laser radiation into the bulk 4-MBA sample (about 30  $\mu$ m) and the molecular density (1.5 g/cm<sup>3</sup>), the number of molecules in the irradiated volume is  $N_{Raman} = 1.2 \times 10^{11}$ . Thus, the SERS enhancement factor for 632.8 nm excitation was calculated to be approximately  $\approx 5.8 (\pm 2.8) \times 10^4$ . The surface roughness was not accounted for in these calculations.

The enhancement factors for 785 and 830 nm excitation wavelengths were estimated by comparative analysis of SERS spectra from 4-MBA by using three excitation wavelengths (632.8, 785, and 830 nm). The inVia Raman spectrometer (Renishaw, Wotton-under Edge, UK) equipped with a confocal Leica microscope, thermoelectrically cooled ( $-70$  °C) CCD camera, and 633, 785, and 830 nm wavelength laser sources was employed. Laser radiation was focused on a sample using a 50 $\times$ /0.75 NA objective lens; the acquisition time was 100 s, and the final spectra were obtained by averaging 9 spectra from different locations on the sample.

Figure S3 compares SERS spectra of 4-MBA observed at different excitation wavelengths. The enhancement factors for 785 and 830 nm excitations were found to be  $2.1 (\pm 0.7) \times 10^3$  and  $2.0 (\pm 0.8) \times 10^3$ , respectively; considerably lower comparing with 632.8 nm excitation wavelength.

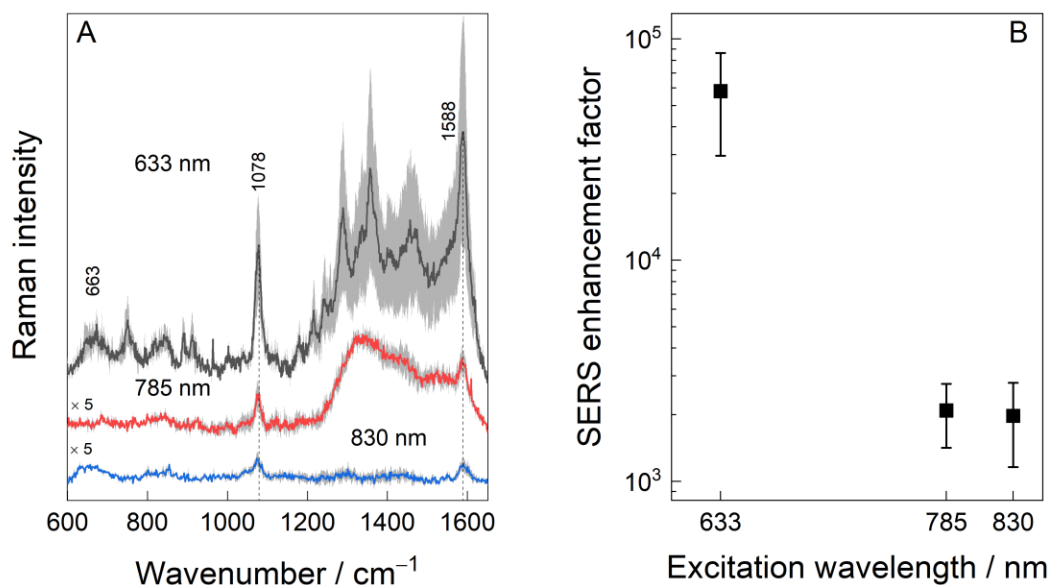

**Figure S3.** (A) SERS spectra of 4-MBA molecule obtained using magneto-plasmonic nanoparticles at 633, 785, and 830 nm laser radiations. Shaded areas represent the standard deviation from 9 measurements. (B) SERS enhancement factors calculated for different laser excitations.

## References

- [S1] Orendorff, C.J.; Gole, A.; Sau, T.K.; Murphy, C. Surface-enhanced Raman spectroscopy of self-assembled monolayers: Sandwich architecture and nanoparticle shape dependence. *Anal. Chem.* **2005**, *77*, 3261–3266.
- [S2] Smith, E.; Dent, G. *Modern Raman spectroscopy: a practical approach*. John Wiley & Sons: Chichester, England, 2005.
